# 1 Metastable GPCR dimers trigger the basal signal by recruiting 2 G-proteins

3

4 Rinshi S. Kasai<sup>1</sup>, Takahiro K. Fujiwara<sup>2</sup>, and Akihiro Kusumi<sup>3\*</sup>

5

6

7

8 <sup>1</sup>Institute for Frontier Life and Medical Sciences and <sup>2</sup>Institute for Advanced Study, Institute  
9 for Integrated Cell-Material Sciences (KUIAS-iCeMS), Kyoto University, Kyoto 606-8507,  
10 Japan. <sup>3</sup>Membrane Cooperativity Unit, Okinawa Institute of Science and Technology  
11 Graduate University (OIST), Onna-son, Okinawa, 904-0495 Japan.

12

13

14

15

16 \*To whom all correspondence should be addressed:

17 Akihiro Kusumi

18 e-mail: [akihiro.kusumi@oist.jp](mailto:akihiro.kusumi@oist.jp)

19 Ph: 011-81-98-966-1373, Fx: 011-81-98-966-1062

20

21

22 **G-protein-coupled receptors (GPCRs) constitute the largest family of integral**  
23 **membrane proteins in the human genome and are responsible for various important**  
24 **signaling pathways for vision, olfaction, gustation, emotion, cell migration, etc. A**  
25 **distinct feature of the GPCR-family proteins is that many GPCRs, including the**  
26 **prototypical GPCR,  $\beta$ 2-adrenergic receptor ( $\beta$ 2AR), elicit low levels of basal constitutive**  
27 **signals without agonist stimulation, which function in normal development and various**  
28 **diseases<sup>1-3</sup>. However, how the basal signals are induced is hardly known. Another**  
29 **general distinctive feature of GPCRs is to form metastable homo-dimers, with lifetimes**  
30 **on the order of 0.1 s, even in the resting state. Here, our single-molecule-based**  
31 **quantification<sup>4</sup> determined the dissociation constant of  $\beta$ 2AR homo-dimers in the PM**  
32 **( $1.6 \pm 0.29$  copies/ $\mu\text{m}^2$ ) and their lifetimes ( $83.2 \pm 6.4$  ms), and furthermore found that,**  
33 **in the resting state, trimeric G-proteins were recruited to both  $\beta$ 2AR monomers and**  
34 **homo-dimers. Importantly, inverse agonists, which suppress the GPCR's basal**  
35 **constitutive activity, specifically blocked the G-protein recruitment to GPCR**  
36 **homo-dimers, without affecting that to monomers. These results indicate that the**  
37 **G-proteins recruited to transient GPCR homo-dimers are responsible for inducing their**  
38 **basic constitutive signals. These results suggest novel drug development strategies to**  
39 **enhance or suppress GPCR homo-dimer formation.**

40

#### 41 **$\beta$ 2AR forms metastable homo-dimers**

42 Single-molecule imaging-tracking revealed that  $\beta$ 2AR (tagged with ACP at the N-terminus and  
43 labelled with ATTO594; **Extended Data Fig. 1**) undergoes thermal diffusion, and often forms  
44 transient homo-dimers, undergoing rapid interconversions between monomers and dimers  
45 continually, as found for other GPCRs (**Fig. 1a, Extended Data Fig. 2a**)<sup>4-8</sup>. Every time we found a  
46  $\beta$ 2AR dimer, we measured the dimer duration, and after observing many dimers, we obtained the  
47 distribution of dimer durations (**Fig. 1b, Extended Data Fig. 2d**). The histogram could be fitted by  
48 a single exponential function, providing the exponential dimer lifetime of 99 ms (throughout this  
49 report, all statistical parameters, including SEM, and the number of experiments are summarised in

50 **Extended Data Tables 1-4**; all observations were performed at 37°C). The lifetime value obtained  
51 in this manner, termed  $\tau_{\text{observed}}$ , was corrected for the photobleaching lifetime and incidental  
52 colocalisation lifetime (this method was used for evaluating all of the lifetimes investigated in the  
53 present research; see **Methods**), giving a dimer lifetime  $\tau$  of  $83.2 \pm 6.4$  ms (**Fig. 1c**). The dimer  
54 lifetime obtained at a time resolution of 4 ms (250 Hz) was  $78.8 \pm 10.7$  ms, after corrections for  
55 photobleaching and incidental colocalisation lifetime (**Extended Data Fig. 3, Fig. 1c**), which is  
56 statistically indistinguishable from the dimer lifetime of 83.2 ms evaluated from 30-Hz observations.  
57 This result indicates that a frame rate of 30 Hz is sufficiently fast for evaluating the homo-dimer  
58 lifetime of  $\beta$ 2AR. Together, these results demonstrate that the  $\beta$ 2AR homo-dimers are indeed quite  
59 metastable, turning into monomers in a matter of 80 ms, and then quite readily forming another  
60 dimer with a different partner molecule (**Extended Data Fig. 2a**).

61

## 62 **2D-dissociation constant for $\beta$ 2AR dimers**

63 Using our single-molecule-based “super-quantification” method<sup>4</sup>, we obtained the 2-dimensional  
64 dissociation constant ( $2D-K_D$ ) of  $\beta$ 2AR homo-dimers in the PM of living cells, which was  $1.6 \pm 0.29$   
65 copies/ $\mu\text{m}^2$  (**Fig. 2a, Extended Data Fig. 2b**; see **Methods**). This value is comparable to the  
66  $2D-K_D$  of another GPCR, formyl-peptide receptor (FPR), which was 3.6 copies/ $\mu\text{m}^2$  (in fact, this was  
67 the first determination of the  $2D-K_D$  in the PM of living cells)<sup>4</sup>.

68 Under physiological conditions,  $\beta$ 2AR is expressed at number densities of  $16 \sim 260$  copies/ $\mu\text{m}^2$ ,  
69 depending on the cell type<sup>9,10</sup>. From the  $2D-K_D$  determined here, we conclude that  $12 \sim 240$   
70 copies/ $\mu\text{m}^2$  exist as dimers and  $4 \sim 20$  copies/ $\mu\text{m}^2$  exist as monomers at any moment; *i.e.*,  $75 \sim$   
71  $92\%$  of  $\beta$ 2AR molecules exist as homo-dimers at any moment, although dimers and monomers are  
72 interconverting rapidly (with a dimer lifetime of  $\sim 80$  ms). In contrast, FPR is mainly expressed in  
73 neutrophils, and an average of about 6,000 copies of FPR copies exist in the PM of a single  
74 neutrophil<sup>11</sup>. Assuming that the neutrophil surface area is  $1,300 \mu\text{m}^2$  (approximated by a sphere with  
75 a radius of  $10 \mu\text{m}$ , providing a number density of  $\sim 4.6$  FPR copies/ $\mu\text{m}^2$ ) and based on the  $2D-K_D$ ,  
76 3,200 copies of FPR would exist as monomers and 2,800 copies as dimers; namely,  $54\%$  of FPR  
77 molecules are dimers, which is about two-thirds of the dimer fraction of  $\beta$ 2AR. Note that, even under

78 the conditions where the dimer population dominates (*i.e.*, at higher expression levels), the dimer  
79 lifetimes do not change and remain on the order of 0.1 s. Only the monomer lifetimes are shortened  
80 at higher expression levels.

81

## 82 **Direct detection of $\beta$ 2AR dimers by the BiFC method**

83 Thus far, we have detected dimers by the colocalisation of two single molecules, which reveals the  
84 close encounters of molecules in the space scale of 220 nm, a distance much greater than the  
85 molecular scale. Therefore, in this method, the incidental approaches of two molecules were  
86 evaluated and subtracted. To ascertain the molecular-level interactions (dimers), we employed  
87 YFP-based bimolecular fluorescence complementation (BiFC; meanwhile, our attempt to detect  
88 FRET did not work, perhaps because the distance between the probes attached to two C-termini was  
89 too far for FRET)<sup>4,12</sup>. In BiFC, two potentially interacting proteins are fused to the N- and C-terminal  
90 half-molecules of YFP. If the proteins of interest form dimers, then YFP may be reconstituted and  
91 emit fluorescence signals (see **Methods**). Thus, if BiFC occurs, it would lend strong support for the  
92 formation of  $\beta$ 2AR dimers.

93 To quantitatively examine BiFC, we varied the expression levels of  $\beta$ 2AR. With an increase in  
94 the number density of expressed molecules (determined by the signal from ATTO594 bound to ACP;  
95 the ATTO594/ACP ratio is  $>0.95^{13}$ ), the number density of the BiFC spots of  $\beta$ 2AR increased,  
96 whereas the BiFC-spot number density of the monomer reference molecule, ACP-TM, increased only  
97 slightly (**Fig. 2b; Extended Data Fig. 2c**). This result indicates that  $\beta$ 2AR forms directly-bound  
98 dimers.

99

## 100 **Inverse agonists reduce the $\beta$ 2AR dimer affinity**

101 Treatments with the inverse agonists ICI-118,551 (ICI) and Timolol reduced the  $\beta$ 2AR dimer lifetime  
102 (0.74x and 0.69x, respectively; **Fig. 1c, Extended Data Fig. 2d**), whereas ICI increased the  $2D-K_D$   
103 of  $\beta$ 2AR by a factor of 2.1 (lowered the  $\beta$ 2AR dimer affinity; **Fig. 1c**), indicating that inverse agonists  
104 reduce the  $\beta$ 2AR dimer affinity. Meanwhile, the addition of the agonist isoproterenol (Iso) prolonged  
105 the dimer lifetime significantly (1.55x) (**Fig. 1c; Extended Data Fig. 2d**). Cholesterol reportedly

106 modulates GPCR functions<sup>14</sup>, but in our experiments, mild cholesterol depletion by  
107 methyl- $\beta$ -cyclodextrin (M $\beta$ CD) treatment did not affect the dimer lifetime (**Fig. 1c**).

108 Since the inverse agonists suppressed the basal constitutive GPCR signaling, and we found  
109 that they also reduced the  $\beta$ 2AR dimer lifetime, we next examined the dimer lifetimes of the  $\beta$ 2AR  
110 mutants with high and low basal activities in the resting state (HBA and LBA mutants, representing  
111 E268A and C327R mutants, respectively<sup>15,16</sup>). The HBA mutant exhibited a 1.78x longer dimer  
112 lifetime, and interestingly, after the inverse-agonist addition, it was reduced to the dimer lifetime of  
113 the wild-type receptor (**Fig. 1c; Extended Data Fig. 2d**). Meanwhile, the LBA mutant exhibited a  
114 0.74x shorter dimer lifetime than that of the wild-type receptor, and the agonist addition did not  
115 affect it (**Fig. 1c; Extended Data Fig. 2d**).

116 Strikingly, the dimer lifetimes of WT- $\beta$ 2AR after the addition of inverse agonists were quite  
117 comparable to those of the LBA mutant, and the dimer lifetime of WT- $\beta$ 2AR after the addition of the  
118 agonist isoproterenol was comparable to that of the HBA mutant. These results suggest that the  
119  $\beta$ 2AR conformations would be quite different after the binding of the inverse agonists and the  
120 agonist isoproterenol, as compared with those before their additions, possibly resembling the  
121 conformations of the LBA and HBA mutants, respectively, and detectable as changes in the  
122 homo-dimer lifetimes.

123

#### 124 **The basal constitutive activity of $\beta$ 2AR**

125 We confirmed the basal constitutive activity of  $\beta$ 2AR, as well as the effects of the  $\beta$ 2AR agonist  
126 isoproterenol and the inverse agonists ICI-118,551 and Timolol, by measuring the changes in the  
127 cytoplasmic cAMP levels in the L-cell line stably expressing  $\beta$ 2AR at higher levels (**Extended Data**  
128 **Fig. 4, Extended Data Table 4**). The addition of the agonist isoproterenol to the cells increased  
129 the cAMP level by a factor of  $\sim 4$ , relative to the control. Meanwhile, the addition of the inverse  
130 agonists ICI-118,551 and Timolol reduced the cAMP levels by factors of 1.9 and 1.3 (53 and 76% of  
131 the control), respectively, showing the presence of the basal constitutive activity of  $\beta$ 2AR and the  
132 effectiveness of the inverse agonists, ICI-118,551 and Timolol, for strongly reducing this basal  
133 activity.

134

135 **Trimeric G proteins are recruited to both  $\beta$ 2AR monomers and dimers**

136 The presence of the basal constitutive activity of  $\beta$ 2AR suggests that a stimulatory trimeric G-protein  
137 might be recruited to  $\beta$ 2AR in the resting state. Therefore, we examined whether  $G\alpha_s$  and  $G\beta$   
138 (conjugated with mGFP) are recruited to  $\beta$ 2AR monomers or dimers, by examining their  
139 colocalisations. Using L cells expressing both  $\beta$ 2AR (ATTO594-ACP- $\beta$ 2AR) and  $G\alpha_s$  or  $G\beta$ , we found  
140 that, even in resting cells,  $G\alpha_s$  and  $G\beta$  were recruited to both  $\beta$ 2AR monomers and dimers (**Fig. 3a;**  
141 **Supplementary Videos 1 and 2**).

142 The recruitment frequencies of  $G\alpha_s$  and  $G\beta$  to  $\beta$ 2AR monomers and dimers were measured  
143 (per sec per  $\mu\text{m}^2$ ) and then normalised by the number densities of  $G\alpha_s$  (or  $G\beta\gamma$ ) and  $\beta$ 2AR protomers  
144 in the PM (normalised frequencies; **Fig. 3b, c; Extended Data Table 3**)<sup>17</sup>. In resting cells, both  
145  $G\alpha_s$  and  $G\beta$  molecules were recruited to  $\beta$ 2AR monomers or dimers equally well, suggesting that  
146 (non-stimulated)  $\beta$ 2AR monomers and/or dimers might induce intracellular Gs-dependent signals  
147 even in the resting state, which would lead to the basal constitutive activity of  $\beta$ 2AR.

148 The exponential dwell lifetimes of G proteins on  $\beta$ 2AR were on the order of 50 ~ 60 ms for all  
149 of the combinations of  $G\alpha_s$  and  $G\beta$  molecules vs  $\beta$ 2AR monomers and dimers (**Extended Data Fig.**  
150 **5**). However, these durations are only the maximal estimates of the dwell lifetimes of  $G\alpha_s$  and  $G\beta$   
151 molecules on  $\beta$ 2AR monomers and dimers, due to the present instrumental limitations of detecting  
152 short binding durations.

153 Notably, the treatment of the cells with the agonist, isoproterenol, did not change the  
154 recruitment frequencies in any combinations of  $G\alpha_s$  and  $G\beta$  vs  $\beta$ 2AR monomers and dimers,  
155 although it significantly enhanced the cytoplasmic cAMP level (**Extended Data Fig. 4, Extended**  
156 **Data Table 4**). This result is quite surprising, but it suggests that the isoproterenol-induced  $\beta$ 2AR  
157 conformation enhanced its GEF activity, rather than increasing the on-rate of G protein binding to  
158  $\beta$ 2AR.

159

160 **Inverse agonists specifically block G-protein recruitment to  $\beta$ 2AR dimers**

161 Next, we examined the effects of the inverse agonists. The recruitment of  $G\alpha_s$  and  $G\beta$  to  $\beta$ 2AR

162 dimers was almost completely blocked, whereas that to  $\beta$ 2AR monomers was unaffected (**Fig. 3b,**  
163 **c**). This result unequivocally shows that  $\beta$ 2AR dimers are responsible for the basal constitutive  
164 activity of  $\beta$ 2AR. Furthermore, it demonstrates that the inverse agonists work by blocking the  
165 recruitment of stimulatory G-proteins to  $\beta$ 2AR dimers, perhaps by inducing  $\beta$ 2AR conformational  
166 changes in the binding sites for G-proteins, rather than blocking the  $\beta$ 2AR dimerisation (although, as  
167 already described, the dimer affinity of the inverse agonist-bound  $\beta$ 2AR is lower, resembling the LBA  
168 mutant, and thus inverse agonists might change the GPCR conformations in two ways: lowering the  
169 GPCR dimer affinity and modulating the G-protein binding sites).

170 To further confirm that  $\beta$ 2AR dimers trigger downstream signaling without an agonist, and to  
171 detect the basal dimer signal at the  $\beta$ 2AR expression levels used for single-molecule experiments,  
172 we examined whether artificially-induced stable  $\beta$ 2AR dimers could elicit the downstream signal. To  
173 detect the downstream signal at very low expression levels of  $\beta$ 2AR, which are necessary for  
174 detecting dimers by single-molecule imaging, and also to detect the signal in a different manner,  
175 rather than observing the cAMP level again (**Extended Data Fig. 4**), we examined the intracellular  
176  $\text{Ca}^{2+}$  mobilisation, which could occur further downstream from the cAMP amplification<sup>18</sup>. The  
177 induction of the artificially-induced stable  $\beta$ 2AR (conjugated to FKBP) dimers by the FKBP-A20187  
178 dimerisation system indeed elicited  $\text{Ca}^{2+}$  mobilisation (**Extended Data Fig. 6**). This result further  
179 confirmed that  $\beta$ 2AR dimers could trigger the downstream signals without agonist stimulation.

180

## 181 **Discussion**

182 All of the class-A GPCRs examined thus far, including  $\beta$ 2AR examined here and by others<sup>5</sup>, FPR, D2  
183 dopamine receptor, M1 muscarinic receptor, and  $\alpha$ 1AR, form metastable dimers with lifetimes on the  
184 order of 0.1 s in the non-stimulated state<sup>4-8</sup>. Therefore, we propose that the dynamic equilibrium  
185 between monomers and homo-dimers is a common characteristic property of the class-A GPCRs.  
186 The homo-dimerisation of GPCRs without any noticeable amino-acid homologies suggests that,  
187 through evolution, GPCRs changed almost all of their amino acids, but conserved the physical ability  
188 to form transient homo-dimers. This infers that these dynamic dimers are critical for some of the  
189 GPCR functions.

190 GPCRs are distinct among other receptors, in that under non-stimulated conditions GPCRs  
191 maintain the low basal constitutive activity, which can be inhibited by inverse agonists. The basal  
192 activities of GPCRs are implied in normal development and various diseases<sup>1-3</sup>. Therefore, we  
193 examined the possibility that the function of the GPCR dimers is to induce the basal constitutive  
194 activity in resting cells (without agonists), and obtained three unexpected, surprising findings. First,  
195 both  $\beta$ 2AR monomers and dimers continually recruit G proteins, one molecule after another, even in  
196 the resting state. Second, the G-protein recruitment frequencies in the resting state are about the  
197 same in the presence of the agonist. Third, more importantly, the inverse agonists specifically and  
198 almost completely blocked the recruitment of  $G\alpha_s$  and  $G\beta$  to  $\beta$ 2AR dimers, without affecting their  
199 recruitment frequencies to  $\beta$ 2AR monomers (**Fig. 3b, c**). The third result unequivocally shows that  
200 the G proteins bound to  $\beta$ 2AR dimers, and not monomers, in the resting state are responsible for  
201 triggering the  $\beta$ 2AR's basal constitutive activity, which is sensitive to inverse agonism. It further  
202 suggests that the binding of the inverse agonists to  $\beta$ 2AR induces conformational changes that  
203 decrease the  $\beta$ 2AR dimer affinities for G proteins (**Fig. 2a**) and at the same time, hide the binding  
204 site(s) for G proteins in the dimer conformations.

205 Although the function of the GPCR dimers is to maintain the basal constitutive activity, it is  
206 critically important to realise that the GPCR dimers are metastable with lifetimes on the order of 0.1  
207 s. Therefore, the GPCR dimers are dispersing continually, forming new dimers with other partner  
208 molecules all the time. In cells, this allows the basal constitutive activities of GPCRs to be maintained  
209 at certain levels, and yet the levels of the basal GPCR signals (the average number density of GPCR  
210 dimers at any time) are regulated globally, by modulating the GPCR number density by varying the  
211 expression levels of the GPCR, and locally, by temporarily and spatially varying the actin-based  
212 membrane skeleton and the membrane curvature<sup>5,19-21</sup>. In addition, the metastable GPCR dimers  
213 might play important roles in the activation of G proteins after the agonist addition.

214 The present results suggest that the major functions of some of the orphan GPCRs might be  
215 performed by the basal activities induced by their homo-dimers, as the GPCR family includes many  
216 orphan receptors<sup>3,22</sup>. Based on the results described in this report, we strongly suggest the pursuit of  
217 drug development strategies that emphasise the generation of more inverse agonists for various



218 GPCRs, as well as drugs that enhance or suppress GPCR homo-dimer formation.

219

220 **Online content**

221 Any methods, additional references, Nature Research reporting summaries, source data, extended  
222 data, supplementary information, acknowledgements, peer review information; details of author  
223 contributions and competing interests; and statements of data and code availability are available.

224

## 225 **Acknowledgements**

226 We thank Prof. Hajime Fujisawa of Nagoya University for providing mouse L cells, Prof.  
227 Tatsuya Haga of Gakushuin University for providing the cDNAs encoding  $\beta$ 2AR and  $G\alpha$ , Prof.  
228 Tobias Meyer of Stanford University for providing the cDNA encoding YFP-FKBP through  
229 Addgene (plasmid 201751), Prof. Michiyuki Matsuda of Kyoto University for the excellent  
230 suggestion about the method for establishing cell lines stably expressing target proteins at  
231 high levels, Assoc. Prof. Akira Hattori for the use of the PerkinElmer time-resolved  
232 fluorescence resonance energy transfer reader, EnVision Xcite, for the cAMP measurement,  
233 Drs. Taka-Aki Tsunoyama of OIST, Ko Hirosawa of Gifu University, Prof. Kenichi Suzuki of Gifu  
234 University, and all of the members of the Kusumi laboratory for valuable discussions,  
235 suggestions, and support, and Mr. Koji Kanemasa of incomings for assistance with figure  
236 preparation. This work was supported by Grants-in-Aid for Scientific Research from the  
237 Japan Society for the Promotion of Science (Kiban C to R.S.K. [17K07333], Wakate B to  
238 R.S.K. [26870292], Kiban S to R.S.K. [Co-PI, 18H05269], and Kiban B to R.S.K. [Co-PI,  
239 17H03666], Kiban B to T.K.F. [16H04775], and Kiban S to A.K. [16H06386]), Grants-in-Aid  
240 for Innovative Areas (Molecular Engine) from the Ministry of Education, Culture, Sports,  
241 Science, and Technology (MEXT) of Japan to R.S.K. [18H05424], and the Joint Research  
242 Program of Biosignal Research Center of Kobe University to R.S.K. [301002]. WPI-iCeMS of  
243 Kyoto University is supported by the World Premier Research Center Initiative (WPI) of the  
244 MEXT.

245

## 246 **Author contributions**

247 R.S.K. performed the single fluorescent-molecule tracking experiments and biochemical  
248 experiments. R.S.K., T.K.F., and A.K. developed and built the single-molecule imaging  
249 station. T.K.F. developed the analysis software. R.S.K. and A.K. conceived and formulated  
250 the project, evaluated and discussed the data, and wrote the manuscript, and all authors  
251 participated in revising the manuscript.

252

253

## 254 **Methods**

### 255 **Cell culture, cDNA construction and expression in L cells, and treatment of cells** 256 **with agonists and inverse agonists.**

257 L cells (a kind gift from H. Fujisawa of Nagoya University), which do not express  $\beta$ 2AR<sup>23</sup>,  
258 were confirmed to be free of mycoplasma contamination using MycoAlert (Lonza), and were  
259 routinely cultured in Dulbecco's Minimum Essential Medium (DMEM; Sigma-Aldrich)  
260 supplemented with 10% (v/v) FBS (Sigma-Aldrich), 100 units/ml penicillin (Wako), and 0.1  
261 mg/ml streptomycin (Wako). Human  $\beta$ 2AR was fused at its N-terminus to the ACP- or  
262 Halo7-tag protein (NEB and Promega, respectively) at the cDNA level, and cloned into the  
263 expression plasmid pEGFP-N1 (Clontech) after the removal of the cDNA region encoding  
264 EGFP. The ACP- and Halo7-tag proteins do not induce dimerisation<sup>12,24</sup>. For the genetic  
265 conjugation of mGFP to  $G\alpha_s$ , the mGFP cDNA was inserted between the region encoding the  
266 71st and 82nd amino acids of mouse  $G\alpha_s$  (Origene) in the pcDNA3.1 (+) vector  
267 (Invitrogen)<sup>25</sup>, and for that to  $G\alpha_i$ , mGFP was fused to the N terminus of bovine  $G\alpha_1$  (a kind  
268 gift from T. Haga of Gakushuin University)<sup>26</sup> in the pEGFP-C1 vector (Clontech), after the  
269 removal of the cDNA region encoding EGFP. The details of the constructed cDNAs are shown  
270 in **Extended Data Fig. 1**. The L cells were transfected with these cDNAs using  
271 LipofectAMINE LTX (Life Technologies), according to the manufacturer's recommendations.  
272 Transfected cells were seeded in glass-base dishes (35 mm $\phi$  with a glass window of 12 mm $\phi$ ,  
273 0.12~0.17-mm-thick glass; Iwaki), and cultured in Ham's F12 medium (Sigma-Aldrich),  
274 supplemented with 10 % (v/v) FBS (Sigma-Aldrich), 100 units/ml penicillin (Wako), and 0.1  
275 mg/ml streptomycin (Wako), for 24~48 h before microscope observations. The F12 medium  
276 was employed because it has a lower fluorescence background as compared with DMEM,  
277 which was used for routine culturing.

278 The agonist, isoproterenol (Sigma-Aldric), and the inverse agonists, ICI-118,551  
279 (Tocris) and timolol (Wako), were dissolved in Hank's balanced salt solution (Nissui)  
280 buffered with 2 mM piperazine-N,N'-bis(ethanesulfonic acid) (PIPES, Dojindo) at pH 7.4

281 (P-HBSS), at concentrations of 20, 200, and 200  $\mu\text{M}$ , respectively. For the additions to the  
282 cells, 1 ml solutions of these reagents were added to the cells in 1 ml of the Ham's F12  
283 medium described above, providing the final concentrations of 10  $\mu\text{M}$  isoproterenol, 100  $\mu\text{M}$   
284 ICI-118,551, and 100  $\mu\text{M}$  timolol.

285

## 286 **Labelling of $\beta\text{2AR}$ with the fluorescent dye ATTO594**

287 ATTO594-Coenzyme A was custom-synthesised by Shinsei Kagaku, by conjugating  
288 ATTO594-maleimide (ATTO-TECH) to Coenzyme A-SH (New England Biolabs), followed by  
289 HPLC purification. The chemical structure of ATTO594-Coenzyme A was confirmed by liquid  
290 chromatography-mass spectrometry (LC-MS; LCMS-2010A EV, Shimadzu). The ACP-tagged  
291  $\beta\text{2AR}$  expressed in the PM of the L cells was labelled with ATTO594, by incubating the cells  
292 with 2  $\mu\text{M}$  ATTO594-Coenzyme A and 1  $\mu\text{M}$  phosphopantetheine transferase (New England  
293 Biolabs) in Ham's F12 medium without FBS at  $\sim 25^\circ\text{C}$  for 20 min. These conditions have  
294 been known to achieve  $\sim 95\%$  labelling of ACP<sup>24</sup>. The cells were washed with P-HBSS three  
295 times, and then subjected to microscope observations. The cells exhibiting the presence of  
296  $\sim 3$  ATTO594-ACP- $\beta\text{2AR}$  spots/ $\mu\text{m}^2$  in the PM were used for single-molecule imaging  
297 experiments.

298

## 299 **Single fluorescent-molecule video imaging of live cells**

300 The fluorescently-labelled ACP- $\beta\text{2AR}$  expressed in the bottom PM was observed at the level  
301 of single molecules at  $37^\circ\text{C}$ , using home-built objective-lens-type total internal reflection  
302 fluorescence microscopes based on Olympus IX-70, Olympus IX-81, or Nikon TE-2000  
303 inverted microscopes<sup>4,7,27,28</sup>, with a 100x objective lens, as optimised for the present  
304 research. Fluorescence images were projected onto a two-stage microchannel plate  
305 intensifier (C8600-03, Hamamatsu Photonics), coupled to an electron bombardment CCD  
306 camera (C7190-23; Hamamatsu Photonics) or an sCMOS camera (ORCA-Flash 4.0;  
307 Hamamatsu Photonics) operated at 30 Hz. For observations at a frame rate of 250 Hz, a  
308 CMOS camera (FASTCAM 1024PCI-II, Photron) was employed<sup>29</sup>. Fluorescent spots were

309 identified by using an in-house computer program, as described previously<sup>4</sup>. The positions  
310 (x and y coordinates) of all of the observed single fluorescent-molecules were determined  
311 by a computer program that employed the method developed previously<sup>30,31</sup>. For the  
312 simultaneous dual-color single-molecule imaging, the images were spectrally split into two  
313 emission arms, each containing the same image intensifier and camera.

314 To maintain the cells at 37°C during the microscope observations, the entire  
315 microscope, except for the two detection arms and the excitation arm, was placed in a  
316 home-built microscope environment chamber made with thermo-insulating transparent  
317 vinyl sheets, and three heating circulators (SKH0-112-OT, Kokensya) were appropriately  
318 placed in the chamber to supply warmed air with slow circulation<sup>28,32,33</sup>. For further  
319 stabilisation, a plate heater (INUG2, Tokai Hit) was mounted on the microscope stage. The  
320 temperature of the surrounding air just above the stage was continually monitored during  
321 the observations with a digital thermometer (DT-312, Intermedical).

322

### 323 **Detection of colocalisation-codiffusion, and evaluations of $\beta$ 2AR dimer lifetimes** 324 **and two-dimensional dissociation constants of $\beta$ 2AR dimers**

325 The number densities of  $\beta$ 2AR molecules existing as (true) dimers and the number density  
326 of the expressed  $\beta$ 2AR molecules were determined by single-molecule imaging of  
327 ATTO594-ACP- $\beta$ 2AR<sup>4</sup>. Colocalisations of two fluorescent spots (molecules) of the same color  
328 (the same ATTO594 probe) or those of two different colors (YFP for BiFC and ATTO594)  
329 were detected when the two fluorescent molecules became localised within 220 nm of each  
330 other<sup>4,28</sup>. The number densities of incidental colocalisations at given molecular densities  
331 were subtracted<sup>4</sup>. The two-dimensional dissociation constant (2D- $K_D$ ) of  $\beta$ 2AR in the PM was  
332 determined by using the method previously developed by us<sup>4</sup>.

333 To directly detect the actual binding of two  $\beta$ 2AR molecules, forming homo-dimers, we  
334 employed the bimolecular fluorescence complementation (BiFC) method<sup>4,34</sup>. The details of  
335 the BiFC method are described in the next subsection.

336 To determine the lifetime of  $\beta$ 2AR dimers using single color observations (with  
337 ATTO594-ACP- $\beta$ 2AR), the duration of each colocalisation-codiffusion event was  
338 measured<sup>4,12</sup>, and after the durations of many events were determined, histograms showing  
339 the distribution of colocalisation durations were obtained. All of the histograms obtained  
340 from the image sequences obtained at a time resolution of 33 ms could be fitted by single  
341 exponential functions, which provided decay time constants (lifetime;  $\tau_{\text{observed}}$ ).  $\tau_{\text{observed}}$  was  
342 then corrected for the photobleaching lifetime of the fluorescent probe ATTO594 ( $\tau_{\text{bleach}} =$   
343  $7.21 \pm 0.81$  s for 30 Hz [ $n = 300$ ] and  $0.812 \pm 0.041$  s for 250 Hz [ $n = 539$ ]), to obtain the  
344 duration of apparent colocalisation ( $\tau_{\text{apparent colocalisation}}$ ), using the equation [ $\tau_{\text{observed}}^{-1} -$   
345  $2\tau_{\text{bleach}}^{-1}]^{-1}$ <sup>4,7,12</sup>. The effective dimer lifetime or the effective binding lifetime of proteins,  $\tau$ ,  
346 was evaluated by subtracting the duration of incidental colocalisation (without specific  
347 molecular interactions;  $\tau_{\text{incidental}}$ ) from  $\tau_{\text{apparent colocalisation}}$ . For details, see our previous  
348 publications<sup>4,7</sup>.  $\tau_{\text{incidental}}$  was evaluated by using a monomer reference molecule, ACP linked  
349 to the transmembrane domain of the low-density lipoprotein receptor, called ACP-TM<sup>7</sup>, and  
350 was found to be  $19 \pm 0.46$  ms (exponential lifetime;  $n = 241$  examined dimers; 39 examined  
351 movies; No. of Freedoms = 97).

352

### 353 **Observations of the recruitment of $G\alpha_s$ and $G\beta\gamma$ to $\beta$ AR monomers and dimers**

354 The recruitment of  $G\alpha_s$  and  $G\beta\gamma$  to  $\beta$ AR monomers and dimers was detected by observing  
355 the colocalisation-codiffusion of mGFP-conjugated  $G\alpha_s$  and  $G\beta\gamma$  with ATTO594-labelled  
356  $\beta$ 2AR monomers and dimers, at the level of single molecules. The colocalisation events  
357 lasting for longer than 66 ms (2 video frames) were analysed. The frequency of incidental  
358 colocalisation was estimated by superimposing an image sequence with one color on  
359 another image sequence with a different color that was artificially shifted by  $\sim 500$  nm  
360 (horizontally), and was subtracted. The recruitment frequencies of  $G\alpha_s$  and  $G\beta\gamma$  to  $\beta$ AR  
361 monomers and dimers (per sec per  $\mu\text{m}^2$ ) were normalised by the number densities of  $G\alpha_s$   
362 (or  $G\beta\gamma$ ) and  $\beta$ 2AR protomers in the PM.

363

364 **The BiFC method for examining the formation of  $\beta$ 2AR dimers (the interaction of**  
365 **two  $\beta$ 2AR molecules at the molecular level)**

366 The YFP-based BiFC(N) and BiFC(C) moieties employed previously<sup>4,35</sup> were respectively  
367 fused to the C terminus of ACP- $\beta$ 2AR (**Extended Data Fig. 1**) in the pEGFP-N1 vector  
368 (Invitrogen; the cDNA region encoding EGFP was removed). These proteins were  
369 co-expressed in L cells, by transfection with LipofectAMINE LTX (Life Technologies)  
370 according to the manufacturer's recommendations, and then ATTO594 was conjugated to  
371 the ACP moieties of ACP- $\beta$ 2AR-BiFC(N) and BiFC(C). As the monomer reference molecule for  
372 the BiFC data, ACP-TM was employed and the YFP-based BiFC(N) and BiFC(C) moieties were  
373 fused to the C terminus of ACP-TM, as previously described<sup>4</sup>. Using dual-color  
374 single-molecule imaging (ATTO594 and mGFP), the number densities of the expressed  
375 molecules (the sum of the number densities of ACP-conjugated molecules) and those of the  
376 fluorescence spots of reconstituted BiFC molecules (spots/ $\mu\text{m}^2$ ) were determined.

377

378 **Evaluation of the changes of the cytosolic cAMP levels**

379 The amounts of cAMP in the cytosol were measured by using the time-resolved fluorescence  
380 resonance energy transfer (TR-FRET) kit from Perkin Elmer (EnVision Xcite), according to  
381 the manufacturer's recommendations. Since the L cells used for single-molecule  
382 experiments expressed very low levels of  $\beta$ 2AR, and thus the basal level of cAMP in the  
383 resting state was below the detection limit, we first established a stable L-cell line  
384 expressing  $\beta$ 2AR at high levels<sup>36</sup>, and used these cells to evaluate the changes of the cAMP  
385 levels in the cytosol before and after the additions of the agonist and inverse agonists. The  
386 drug treatments were performed as described at the end of the subsection, "Cell culture,  
387 cDNA construction and expression in L cells, and treatment of cells with agonists and inverse  
388 agonists".

389

390 **Generation of artificial  $\beta$ 2AR dimers and observations of  $\text{Ca}^{2+}$  mobilisation**

391 To artificially generate stable homo-dimers of  $\beta$ 2AR, we employed a chemical dimerising

392 system based on the FK506-binding protein (FKBP)-ligand interface<sup>37</sup>. First, the cDNA  
393 encoding Halo7- $\beta$ 2AR-FKBP\_F36V ( $\beta$ 2AR-FKBP) was cloned into the expression plasmid  
394 vector pEGFP-N1 (Clontech) after the removal of the cDNA region encoding EGFP, and then  
395 the cDNA encoding FKBP\_F36V was replaced by the cDNA encoding FKBP (obtained from  
396 the YFP-FKBP cDNA, the Addgene plasmid 20175 donated by T. Meyer<sup>38</sup>). Halo7- $\beta$ 2AR-FKBP  
397 expressed in L cells was fluorescently labelled by incubating the cells for 24 - 48 h with 5 nM  
398 Halo-tag conjugated with SaraFluor 650T (Goryo-Kayaku;  
399 SaraFluor650T-Halo7- $\beta$ 2AR-FKBP). The crosslinker for FKBP, AP20187 (Takara), was added  
400 at a final concentration of 5 nM during the image acquisition, and dimer formation was  
401 detected at the level of single molecules.

402 For Ca<sup>2+</sup> mobilisation assays, a freshly-prepared 1 mg/ml DMSO solution of Fluo4-AM  
403 (Dojindo) was added to HBSS buffered with 10 mM  
404 (4-(2-hydroxyethyl)-1-piperazineethanesulfonic acid) at pH 7.4 (H-HBSS), containing 1.25  
405 mM Probenecid (Dojindo) and 0.04 % (w/v) Pluronic F127 (Dojindo) (loading buffer), to  
406 obtain a final Fluo4-AM concentration of 5  $\mu$ g/ml (4.6  $\mu$ M), basically following the  
407 manufacturer's recommendations. The L cells prepared as above for detecting dimers of  
408 SaraFluor650T-Halo7- $\beta$ 2AR-FKBP at the single-molecule level were incubated with the  
409 loading buffer at 37°C for 1 h and washed with H-HBSS three times, and then 500  $\mu$ l  
410 H-HBSS was added for epi-fluorescence microscopic observations. Fluo4 fluorescence was  
411 recorded at 2 Hz. The stable dimers of SaraFluor650T-Halo7- $\beta$ 2AR-FKBP were induced by  
412 the addition of 5 nM AP20187, as described above. To determine the saturation levels of the  
413 fluorescence signal intensity of Fluo4 at higher concentrations of Ca<sup>2+</sup>, 1  $\mu$ M (final  
414 concentration) ionomycin (Wako) was added to the cells to equalise the intracellular Ca<sup>2+</sup>  
415 concentrations with that outside the cells (1.3 mM).

416

#### 417 **Software and statistical analysis**

418 Superimpositions of image sequences obtained from dual-color single fluorescent molecule  
419 observations and single fluorescent spot tracking were performed using C++-based



420 computer programs produced in-house, as described previously<sup>28,30</sup>. Statistical analysis was  
421 performed by the two-sided Welch's t test (except for the data shown in **Extended Data**  
422 **Fig. 5c**, where the one-sided t test was used) or the Brunner-Munzel statistical test, by  
423 using the R Studio Software (R Foundation for Statistical Computing,  
424 <https://www.R-project.org/>). *P* values less than 0.05 were considered to be statistically  
425 significant. Linear and non-linear curve fittings were performed by using OriginPro 9.1 for  
426 Windows, with appropriate scripts.

427

### 428 **Data and code availability**

429 All data generated or analysed for this study are available within the paper and its  
430 associated Extended Data Figures and Tables. All other data presented and software codes  
431 are available upon request from the corresponding author. A **Reporting Summary** for this  
432 paper is available.

433

434

435 **References**

- 436 1 Seifert, R. & Wenzel-Seifert, K. Constitutive activity of G-protein-coupled receptors: cause of  
437 disease and common property of wild-type receptors. *Naunyn-Schmiedeberg's Arch.*  
438 *Pharmacol.* **366**, 381-416 (2002).
- 439 2 Nakashima, A. *et al.* Agonist-independent GPCR activity regulates anterior-posterior  
440 targeting of olfactory sensory neurons. *Cell* **154**, 1314-1325 (2013).
- 441 3 Wacker, D., Stevens, R.C. & Roth, B.L. How Ligands Illuminate GPCR Molecular  
442 Pharmacology. *Cell* **170**, 414-427 (2017).
- 443 4 Kasai, R.S. *et al.* Full characterization of GPCR monomer-dimer dynamic equilibrium by single  
444 molecule imaging. *J. Cell Biol.* **192**, 463-480 (2011).
- 445 5 Calebiro, D. *et al.* Single-molecule analysis of fluorescently labeled G-protein-coupled  
446 receptors reveals complexes with distinct dynamics and organization. *Proc. Natl. Acad. Sci.*  
447 *USA* **110**, 743-748 (2013).
- 448 6 Hern, J.A. *et al.* Formation and dissociation of M1 muscarinic receptor dimers seen by total  
449 internal reflection fluorescence imaging of single molecules. *Proc. Natl. Acad. Sci. USA* **107**,  
450 2693-2698 (2010).
- 451 7 Kasai, R.S., Ito, S.V., Awane, R.M., Fujiwara, T.K. & Kusumi, A. The Class-A GPCR Dopamine  
452 D2 Receptor Forms Transient Dimers Stabilized by Agonists: Detection by Single-Molecule  
453 Tracking. *Cell Biochem. Biophys.* **76**, 29-37 (2018).
- 454 8 Tabor, A. *et al.* Visualization and ligand-induced modulation of dopamine receptor  
455 dimerization at the single molecule level. *Sci. Rep.* **6**, 33233 (2016).
- 456 9 James, J.R., Oliveira, M.I., Carmo, A.M., Iaboni, A. & Davis, S.J. A rigorous experimental  
457 framework for detecting protein oligomerization using bioluminescence resonance energy  
458 transfer. *Nat. Methods* **3**, 1001-1006 (2006).
- 459 10 Mercier, J.F., Salahpour, A., Angers, S., Breit, A. & Bouvier, M. Quantitative assessment of  
460 beta 1- and beta 2-adrenergic receptor homo- and heterodimerization by bioluminescence  
461 resonance energy transfer. *J. Biol. Chem.* **277**, 44925-44931 (2002).
- 462 11 Tennenberg, S.D., Zemlan, F.P. & Solomkin, J.S. Characterization of

- 463 N-formyl-methionyl-leucyl-phenylalanine receptors on human neutrophils. Effects of isolation  
464 and temperature on receptor expression and functional activity. *J. Immunol.* **141**,  
465 3937-3944 (1988).
- 466 12 Suzuki, K.G. *et al.* Transient GPI-anchored protein homodimers are units for raft organization  
467 and function. *Nat. Chem. Biol.* **8**, 774-783 (2012).
- 468 13 Meyer, B.H. *et al.* FRET imaging reveals that functional neurokinin-1 receptors are  
469 monomeric and reside in membrane microdomains of live cells. *Proc. Natl. Acad. Sci. USA*  
470 **103**, 2138-2143 (2006).
- 471 14 Katritch, V., Cherezov, V. & Stevens, R.C. Structure-function of the G protein-coupled  
472 receptor superfamily. *Annu. Rev. Pharmacool. Toxicol.* **53**, 531-556 (2013).
- 473 15 Ballesteros, J.A. *et al.* Activation of the beta 2-adrenergic receptor involves disruption of an  
474 ionic lock between the cytoplasmic ends of transmembrane segments 3 and 6. *J. Biol. Chem.*  
475 **276**, 29171-29177 (2001).
- 476 16 O'Dowd, B.F. *et al.* Site-directed mutagenesis of the cytoplasmic domains of the human beta  
477 2-adrenergic receptor. Localization of regions involved in G protein-receptor coupling. *J. Biol.*  
478 *Chem.* **263**, 15985-15992 (1988).
- 479 17 Sungkaworn, T. *et al.* Single-molecule imaging reveals receptor-G protein interactions at cell  
480 surface hot spots. *Nature* **550**, 543-547 (2017).
- 481 18 Schmidt, M. *et al.* A new phospholipase-C-calcium signalling pathway mediated by cyclic AMP  
482 and a Rap GTPase. *Nat. Cell Biol.* **3**, 1020-1024 (2001).
- 483 19 Kalay, Z., Fujiwara, T.K. & Kusumi, A. Confining domains lead to reaction bursts: reaction  
484 kinetics in the plasma membrane. *PLoS one* **7**, e32948 (2012).
- 485 20 Kusumi, A. *et al.* Dynamic organizing principles of the plasma membrane that regulate signal  
486 transduction: commemorating the fortieth anniversary of Singer and Nicolson's fluid-mosaic  
487 model. *Annu. Rev. Cell Dev. Biol.* **28**, 215-250 (2012).
- 488 21 Kusumi, A. *et al.* Paradigm shift of the plasma membrane concept from the two-dimensional  
489 continuum fluid to the partitioned fluid: high-speed single-molecule tracking of membrane  
490 molecules. *Annu. Rev. Biophys. Biomol. Struct.* **34**, 351-378 (2005).

- 491 22 Davenport, A.P. *et al.* International Union of Basic and Clinical Pharmacology. LXXXVIII. G  
492 protein-coupled receptor list: recommendations for new pairings with cognate ligands.  
493 *Pharmacol. Rev.* **65**, 967-986 (2013).
- 494 23 Dixon, R.A. *et al.* Ligand binding to the beta-adrenergic receptor involves its rhodopsin-like  
495 core. *Nature* **326**, 73-77 (1987).
- 496 24 George, N., Pick, H., Vogel, H., Johnsson, N. & Johnsson, K. Specific labeling of cell surface  
497 proteins with chemically diverse compounds. *J. Am. Chem. Soc.* **126**, 8896-8897 (2004).
- 498 25 Yu, J.Z. & Rasenick, M.M. Real-time visualization of a fluorescent G(alpha)(s): dissociation of  
499 the activated G protein from plasma membrane. *Mol. Pharmacol.* **61**, 352-359 (2002).
- 500 26 Janetopoulos, C., Jin, T. & Devreotes, P. Receptor-mediated activation of heterotrimeric  
501 G-proteins in living cells. *Science* **291**, 2408-2411 (2001).
- 502 27 Iino, R., Koyama, I. & Kusumi, A. Single molecule imaging of green fluorescent proteins in  
503 living cells: E-cadherin forms oligomers on the free cell surface. *Biophys. J.* **80**, 2667-2677  
504 (2001).
- 505 28 Koyama-Honda, I. *et al.* Fluorescence imaging for monitoring the colocalization of two single  
506 molecules in living cells. *Biophys. J.* **88**, 2126-2136 (2005).
- 507 29 Hiramoto-Yamaki, N. *et al.* Ultrafast diffusion of a fluorescent cholesterol analog in  
508 compartmentalized plasma membranes. *Traffic* **15**, 583-612 (2014).
- 509 30 Fujiwara, T., Ritchie, K., Murakoshi, H., Jacobson, K. & Kusumi, A. Phospholipids undergo  
510 hop diffusion in compartmentalized cell membrane. *J. Cell Biol.* **157**, 1071-1081 (2002).
- 511 31 Gelles, J., Schnapp, B.J. & Sheetz, M.P. Tracking kinesin-driven movements with  
512 nanometre-scale precision. *Nature* **331**, 450-453 (1988).
- 513 32 Murakoshi, H. *et al.* Single-molecule imaging analysis of Ras activation in living cells. *Proc.*  
514 *Natl. Acad. Sci. USA* **101**, 7317-7322 (2004).
- 515 33 Tsunoyama, T.A. *et al.* Super-long single-molecule tracking reveals  
516 dynamic-anchorage-induced integrin function. *Nat. Chem. Biol.* **14**, 497-506 (2018).
- 517 34 Hu, C.D., Chinenov, Y. & Kerppola, T.K. Visualization of interactions among bZIP and Rel  
518 family proteins in living cells using bimolecular fluorescence complementation. *Mol. Cell* **9**,

- 519 789-798 (2002).
- 520 35 Briddon, S.J. & Hill, S.J. Pharmacology under the microscope: the use of fluorescence  
521 correlation spectroscopy to determine the properties of ligand-receptor complexes. *Trends*  
522 *Pharmacol. Sci.* **28**, 637-645 (2007).
- 523 36 Yusa, K., Zhou, L., Li, M.A., Bradley, A. & Craig, N.L. A hyperactive piggyBac transposase for  
524 mammalian applications. *Proc. Natl. Acad. Sci. USA* **108**, 1531-1536 (2011).
- 525 37 Clackson, T. *et al.* Redesigning an FKBP-ligand interface to generate chemical dimerizers with  
526 novel specificity. *Proc. Natl. Acad. Sci. USA* **95**, 10437-10442 (1998).
- 527 38 Inoue, T., Heo, W.D., Grimley, J.S., Wandless, T.J. & Meyer, T. An inducible translocation  
528 strategy to rapidly activate and inhibit small GTPase signaling pathways. *Nat. Methods* **2**,  
529 415-418 (2005).
- 530
- 531

**Fig. 1**

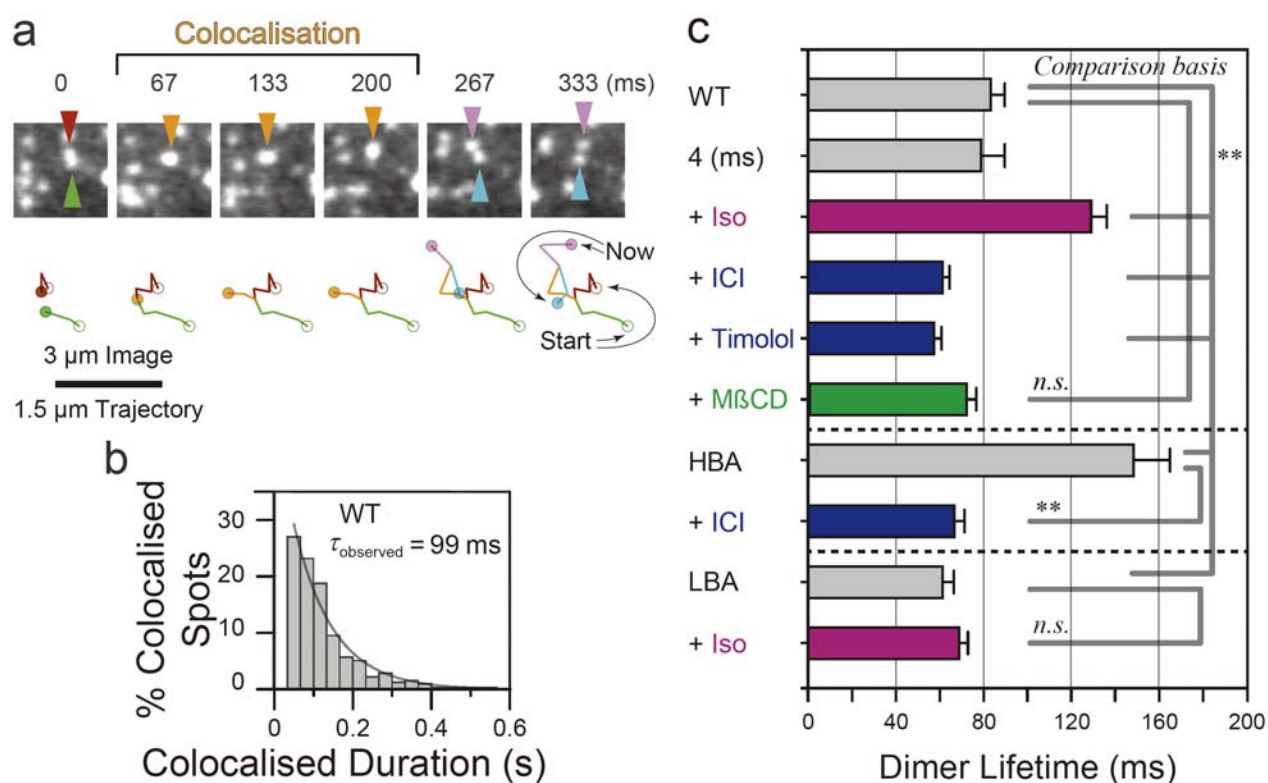

**Fig. 1.  $\beta$ 2AR dynamically interconverts between monomers and transient homodimers.**

Mean, SEM, the number of experiments, and other statistical parameters are summarised in

**Extended Data Table 1.**

**(a)** A typical snapshot sequence (among 13 movies) showing transient homo-dimerisation of  $\beta$ 2AR molecules. Two molecules became colocalised at frame 2 (67 ms), diffused together for 134 ms (colocalisation), and then separated.

**(b)** Histogram showing the distribution of the durations of the WT- $\beta$ 2AR colocalisation events (homo-dimers). Note that the  $\tau_{\text{observed}}$  is the value before corrections for photobleaching and incidental colocalisations.

**(c)** Summary of the dimer lifetimes (after corrections) of WT and mutant  $\beta$ 2AR obtained before and after the additions of various reagents. \*\* and *n.s.*: statistically significant and non-significant with *P* values smaller or greater than 0.05, respectively. This convention was used throughout this report.

**Fig. 2**

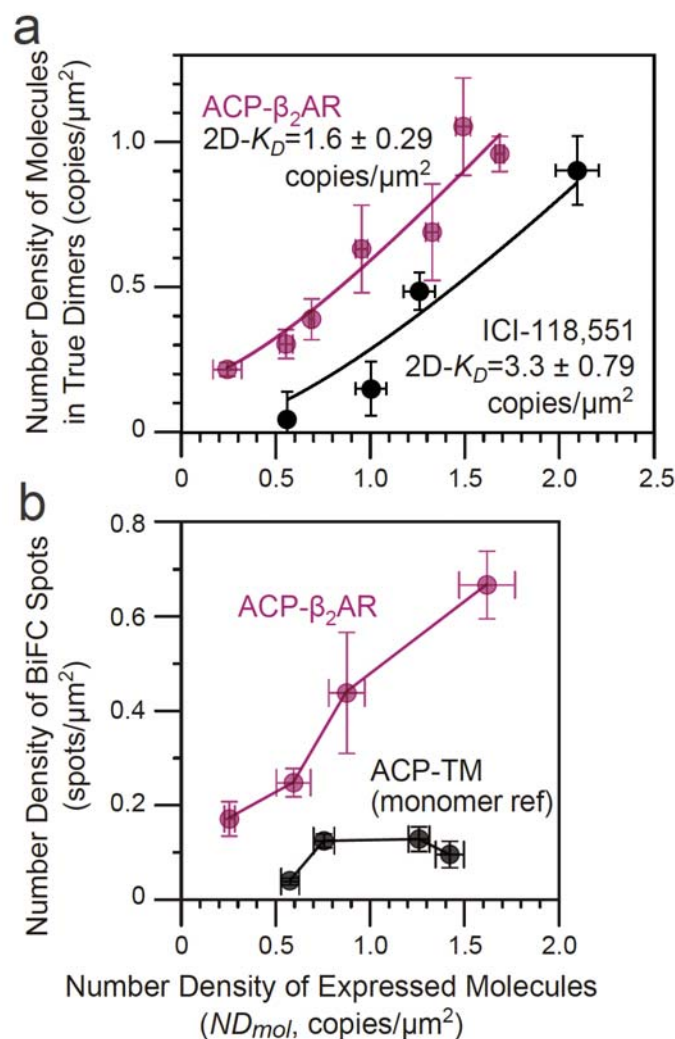

**Fig. 2. Determining the 2D-KD of  $\beta_2$ AR dimers with/without an inverse agonist and the BiFC detection of  $\beta_2$ AR dimers.** Mean, SEM, the number of experiments, and other statistical parameters are summarised in **Extended Data Table 2**.

The number density of  $\beta_2$ AR molecules in true dimers (after subtraction of incidental overlap of fluorescent spots;  $\pm$  inverse agonist; fitted with Eq. 5 in Ref4; red curve) **(a)** and the number densities of the BiFC spots for ACP- $\beta_2$ AR-YFP(N/C) and ACP-TM-YFP(N/C) (monomer reference molecule) **(b)**, plotted as a function of the number density of expressed molecules ( $ND_{mol}$ ). In **b**, the lines are provided to facilitate visualisation.

**Fig. 3**

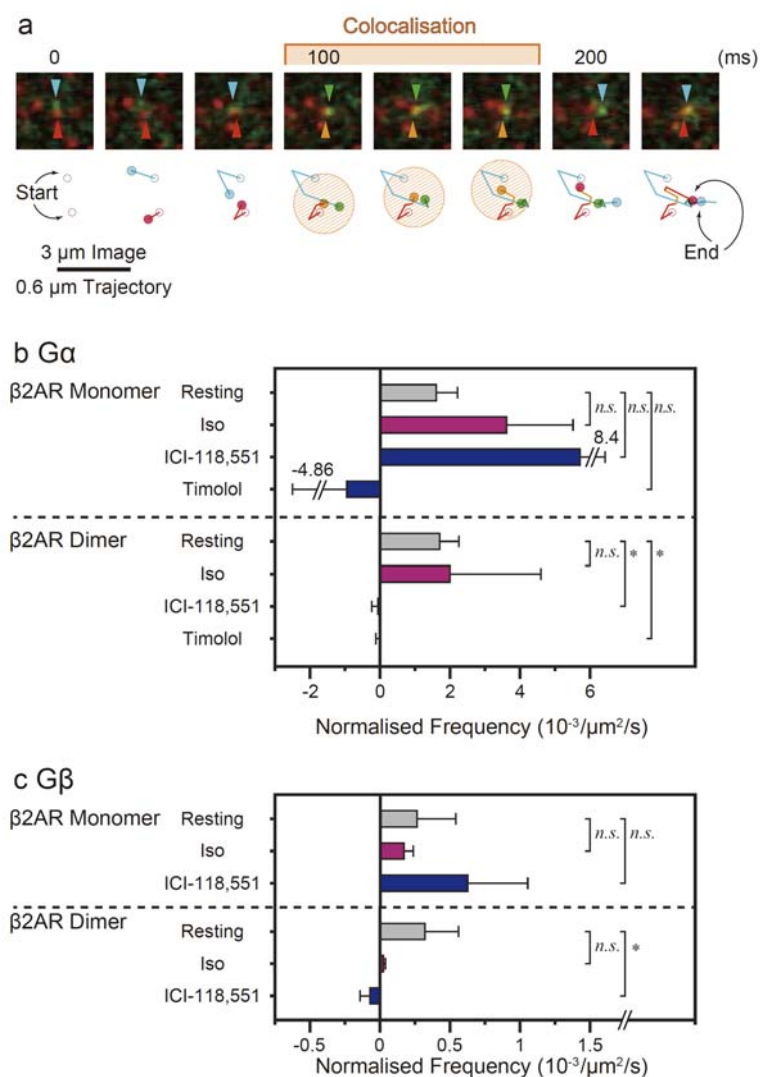

**Fig. 3. Non-stimulated  $\beta$ 2AR homo-dimers recruit trimeric G-proteins: a process**

**suppressed by inverse agonists.** Mean, SEM, the number of experiments, and other statistical parameters are summarised in **Extended Data Table 3**.

**(a)** A typical snapshot image sequence (among 40 movies) showing that a trimeric G-protein  $G\alpha_s$  subunit transiently binds to a  $\beta$ 2AR monomer.

**(b, c)** The inverse agonists, ICI-118,551 and Timolol, inhibitors of  $\beta$ 2AR basal constitutive activities, blocked the recruitment of trimeric G-proteins to  $\beta$ 2AR homo-dimers, but not that to monomers.  $G\alpha_s$  **(b)** and  $G\beta\gamma$  **(c)** colocalisation frequencies with  $\beta$ 2AR monomers and homo-dimers. The normalised frequencies of colocalisations = the number of colocalisation events per sec per  $\mu\text{m}^2$  normalised by the number densities of  $G\alpha_s$  (or  $G\beta\gamma$ ) and  $\beta$ 2AR protomers.
